# Supplementary material
Source: publisher figshare collection journal article supplement (https://acs.figshare.com/ndownloader/files/4862812)
Supplement: Supplementary file 1 [file 4862812]

 
data_ls196 
 
_audit_creation_method            SHELXL-97 
_chemical_name_systematic 
; 
 ? 
; 
_chemical_name_common             ? 
_chemical_melting_point           ? 
_chemical_formula_moiety          'C36 H24 F4 Ir N4 O4, F6 P'
_chemical_formula_sum 
 'C36 H24 F10 Ir N4 O4 P' 
_chemical_formula_weight          989.78 
 
loop_ 
 _atom_type_symbol 
 _atom_type_description 
 _atom_type_scat_dispersion_real 
 _atom_type_scat_dispersion_imag 
 _atom_type_scat_source 
 'C'  'C'   0.0033   0.0016 
 'International Tables Vol C Tables 4.2.6.8 and 6.1.1.4' 
 'H'  'H'   0.0000   0.0000 
 'International Tables Vol C Tables 4.2.6.8 and 6.1.1.4' 
 'F'  'F'   0.0171   0.0103 
 'International Tables Vol C Tables 4.2.6.8 and 6.1.1.4' 
 'Ir'  'Ir'  -1.4442   7.9887 
 'International Tables Vol C Tables 4.2.6.8 and 6.1.1.4' 
 'N'  'N'   0.0061   0.0033 
 'International Tables Vol C Tables 4.2.6.8 and 6.1.1.4' 
 'O'  'O'   0.0106   0.0060 
 'International Tables Vol C Tables 4.2.6.8 and 6.1.1.4' 
 'P'  'P'   0.1023   0.0942 
 'International Tables Vol C Tables 4.2.6.8 and 6.1.1.4' 
 
_symmetry_cell_setting            monoclinic 
_symmetry_space_group_name_H-M    'P 21/n' 
_symmetry_space_group_name_Hall   '-P 2yn'
 
loop_ 
 _symmetry_equiv_pos_as_xyz 
 'x, y, z' 
 '-x+1/2, y+1/2, -z+1/2' 
 '-x, -y, -z' 
 'x-1/2, -y-1/2, z-1/2' 
 
_cell_length_a                    9.5479(5) 
_cell_length_b                    30.4524(13) 
_cell_length_c                    12.3038(5) 
_cell_angle_alpha                 90.00 
_cell_angle_beta                  95.045(4) 
_cell_angle_gamma                 90.00 
_cell_volume                      3563.5(3) 
_cell_formula_units_Z             4 
_cell_measurement_temperature     295.0(2) 
_cell_measurement_reflns_used     12678
_cell_measurement_theta_min       3.3382
_cell_measurement_theta_max       29.2583
 
_exptl_crystal_description        plate 
_exptl_crystal_colour             yellow
_exptl_crystal_size_max           0.26
_exptl_crystal_size_mid           0.19
_exptl_crystal_size_min           0.03
_exptl_crystal_density_meas       ? 
_exptl_crystal_density_diffrn     1.845 
_exptl_crystal_density_method     'not measured' 
_exptl_crystal_F_000              1936 
_exptl_absorpt_coefficient_mu     3.893 
_exptl_absorpt_correction_type    'multi-scan'
_exptl_absorpt_correction_T_min   0.29423
_exptl_absorpt_correction_T_max   1.00000
_exptl_absorpt_process_details    
;
CrysAlisPro, Agilent Technologies,
Version 1.171.35.21 (release 20-01-2012 CrysAlis171 .NET)
(compiled Jan 23 2012,18:06:46)
Empirical absorption correction using spherical harmonics,
 implemented in SCALE3 ABSPACK scaling algorithm.
;

_exptl_special_details 
; 
 ? 
; 
 
_diffrn_ambient_temperature       295.0(2) 
_diffrn_radiation_wavelength      0.71073 
_diffrn_radiation_type            MoK\a 
_diffrn_radiation_source          'Enhance (Mo) X-ray Source' 
_diffrn_radiation_monochromator   graphite 
_diffrn_measurement_device_type   'Xcalibur, Atlas, Gemini ultra'
_diffrn_measurement_method        '\w scans' 
_diffrn_detector_area_resol_mean  10.4015
_diffrn_standards_number          ? 
_diffrn_standards_interval_count  ? 
_diffrn_standards_interval_time   ? 
_diffrn_standards_decay_%         ? 
_diffrn_reflns_number             39065 
_diffrn_reflns_av_R_equivalents   0.0581 
_diffrn_reflns_av_sigmaI/netI     0.0366 
_diffrn_reflns_limit_h_min        -10 
_diffrn_reflns_limit_h_max        11 
_diffrn_reflns_limit_k_min        -36 
_diffrn_reflns_limit_k_max        35 
_diffrn_reflns_limit_l_min        -14 
_diffrn_reflns_limit_l_max        14 
_diffrn_reflns_theta_min          3.39 
_diffrn_reflns_theta_max          25.05 
_reflns_number_total              6300 
_reflns_number_gt                 5260 
_reflns_threshold_expression      >2sigma(I) 
 
_computing_data_collection
;
CrysAlisPro, Agilent Technologies,
Version 1.171.35.21 (release 20-01-2012 CrysAlis171 .NET)
(compiled Jan 23 2012,18:06:46)
;
_computing_cell_refinement
;
CrysAlisPro, Agilent Technologies,
Version 1.171.35.21 (release 20-01-2012 CrysAlis171 .NET)
(compiled Jan 23 2012,18:06:46)
;
_computing_data_reduction
;
CrysAlisPro, Agilent Technologies,
Version 1.171.35.21 (release 20-01-2012 CrysAlis171 .NET)
(compiled Jan 23 2012,18:06:46)
;
_computing_structure_solution     'SHELXS-97 (Sheldrick, 1990)' 
_computing_structure_refinement   'SHELXL-97 (Sheldrick, 1997)' 
_computing_molecular_graphics     ? 
_computing_publication_material   ? 
 
_refine_special_details 
; 
 Refinement of F^2^ against ALL reflections.  The weighted R-factor wR and 
 goodness of fit S are based on F^2^, conventional R-factors R are based 
 on F, with F set to zero for negative F^2^. The threshold expression of 
 F^2^ > 2sigma(F^2^) is used only for calculating R-factors(gt) etc. and is 
 not relevant to the choice of reflections for refinement.  R-factors based 
 on F^2^ are statistically about twice as large as those based on F, and R- 
 factors based on ALL data will be even larger. 
; 
 
_refine_ls_structure_factor_coef  Fsqd  
_refine_ls_matrix_type            full 
_refine_ls_weighting_scheme       calc  
_refine_ls_weighting_details 
 'calc w=1/[\s^2^(Fo^2^)+(0.0383P)^2^+2.5086P] where P=(Fo^2^+2Fc^2^)/3' 
_atom_sites_solution_primary      direct 
_atom_sites_solution_secondary    difmap 
_atom_sites_solution_hydrogens    geom 
_refine_ls_hydrogen_treatment     constr 
_refine_ls_extinction_method      none 
_refine_ls_extinction_coef        ? 
_refine_ls_number_reflns          6300 
_refine_ls_number_parameters      507 
_refine_ls_number_restraints      0 
_refine_ls_R_factor_all           0.0601 
_refine_ls_R_factor_gt            0.0460 
_refine_ls_wR_factor_ref          0.1034 
_refine_ls_wR_factor_gt           0.0991 
_refine_ls_goodness_of_fit_ref    1.110 
_refine_ls_restrained_S_all       1.110 
_refine_ls_shift/su_max           0.001 
_refine_ls_shift/su_mean          0.000 
 
loop_ 
 _atom_site_label 
 _atom_site_type_symbol 
 _atom_site_fract_x 
 _atom_site_fract_y 
 _atom_site_fract_z 
 _atom_site_U_iso_or_equiv 
 _atom_site_adp_type 
 _atom_site_occupancy 
 _atom_site_symetry_multiplicity 
 _atom_site_calc_flag 
 _atom_site_refinement_flags 
 _atom_site_disorder_assembly 
 _atom_site_disorder_group 
Ir1 Ir 0.54789(3) 0.613058(8) 0.26561(2) 0.04004(10) Uani 1 1 d . . . 
P1 P 0.0059(4) 0.68459(14) 0.5629(3) 0.1135(13) Uani 1 1 d . . . 
F1 F 0.0285(5) 0.54942(18) 0.1490(5) 0.0859(16) Uani 1 1 d . . . 
F2 F 0.2109(6) 0.5284(2) 0.5099(5) 0.1032(19) Uani 1 1 d . . . 
F3 F 0.6505(7) 0.52998(19) -0.0939(4) 0.0987(18) Uani 1 1 d . . . 
F4 F 0.8234(6) 0.45965(16) 0.2257(5) 0.0960(18) Uani 1 1 d . . . 
F5 F -0.0613(12) 0.7132(8) 0.6462(10) 0.346(12) Uani 1 1 d . . . 
F6 F 0.0580(11) 0.6610(4) 0.4714(8) 0.220(5) Uani 1 1 d . . . 
F7 F -0.1504(8) 0.6854(3) 0.5006(6) 0.143(3) Uani 1 1 d . . . 
F8 F -0.0274(13) 0.6446(6) 0.6197(13) 0.299(10) Uani 1 1 d . . . 
F9 F 0.1507(8) 0.6875(4) 0.6231(9) 0.195(4) Uani 1 1 d . . . 
F10 F 0.0345(10) 0.7286(3) 0.5098(16) 0.279(8) Uani 1 1 d . . . 
O1 O 1.1554(8) 0.7342(2) 0.1499(7) 0.111(2) Uani 1 1 d . . . 
O2 O 1.0014(6) 0.78653(19) 0.1917(6) 0.0822(19) Uani 1 1 d . . . 
O3 O 0.2656(11) 0.8170(3) 0.4418(8) 0.140(3) Uani 1 1 d . . . 
O4 O 0.4847(8) 0.8331(2) 0.4118(6) 0.089(2) Uani 1 1 d . . . 
N1 N 0.7310(5) 0.65282(16) 0.2552(4) 0.0381(12) Uani 1 1 d . . . 
N2 N 0.4901(6) 0.67481(17) 0.3305(4) 0.0440(13) Uani 1 1 d . . . 
N3 N 0.5886(6) 0.58919(18) 0.4222(4) 0.0452(13) Uani 1 1 d . . . 
N4 N 0.4910(6) 0.62926(18) 0.1061(4) 0.0439(13) Uani 1 1 d . . . 
C1 C 0.8528(7) 0.6397(2) 0.2201(6) 0.0472(17) Uani 1 1 d . . . 
H1 H 0.8672 0.6098 0.2095 0.057 Uiso 1 1 calc R . . 
C2 C 0.9580(7) 0.6687(2) 0.1992(6) 0.0475(17) Uani 1 1 d . . . 
H2 H 1.0428 0.6581 0.1779 0.057 Uiso 1 1 calc R . . 
C3 C 0.9377(7) 0.7133(2) 0.2097(5) 0.0453(16) Uani 1 1 d . . . 
C4 C 0.8126(7) 0.7271(2) 0.2473(5) 0.0442(16) Uani 1 1 d . . . 
H4 H 0.7959 0.7569 0.2562 0.053 Uiso 1 1 calc R . . 
C5 C 0.7119(7) 0.6966(2) 0.2717(5) 0.0398(15) Uani 1 1 d . . . 
C6 C 0.5798(7) 0.7085(2) 0.3182(5) 0.0404(15) Uani 1 1 d . . . 
C7 C 0.5482(7) 0.7510(2) 0.3481(5) 0.0462(16) Uani 1 1 d . . . 
H7 H 0.6106 0.7737 0.3376 0.055 Uiso 1 1 calc R . . 
C8 C 0.4234(8) 0.7594(2) 0.3936(6) 0.0507(18) Uani 1 1 d . . . 
C9 C 0.3355(9) 0.7246(3) 0.4100(7) 0.063(2) Uani 1 1 d . . . 
H9 H 0.2526 0.7292 0.4428 0.076 Uiso 1 1 calc R . . 
C10 C 0.3705(8) 0.6830(3) 0.3777(6) 0.058(2) Uani 1 1 d . . . 
H10 H 0.3099 0.6598 0.3888 0.069 Uiso 1 1 calc R . . 
C11 C 1.0509(7) 0.7468(2) 0.1811(5) 0.0424(16) Uani 1 1 d . . . 
C12 C 1.0863(11) 0.8217(3) 0.1576(9) 0.092(3) Uani 1 1 d . . . 
H12A H 1.1136 0.8157 0.0859 0.137 Uiso 1 1 calc R . . 
H12B H 1.1688 0.8245 0.2077 0.137 Uiso 1 1 calc R . . 
H12C H 1.0336 0.8486 0.1564 0.137 Uiso 1 1 calc R . . 
C13 C 0.3788(8) 0.8073(3) 0.4199(6) 0.0488(18) Uani 1 1 d . . . 
C14 C 0.4543(16) 0.8804(3) 0.4153(11) 0.125(5) Uani 1 1 d . . . 
H14A H 0.5224 0.8962 0.3776 0.187 Uiso 1 1 calc R . . 
H14B H 0.4589 0.8900 0.4898 0.187 Uiso 1 1 calc R . . 
H14C H 0.3619 0.8859 0.3806 0.187 Uiso 1 1 calc R . . 
C15 C 0.7138(9) 0.5926(3) 0.4798(6) 0.0573(19) Uani 1 1 d . . . 
H15 H 0.7874 0.6065 0.4490 0.069 Uiso 1 1 calc R . . 
C16 C 0.7356(11) 0.5756(3) 0.5845(7) 0.075(3) Uani 1 1 d . . . 
H16 H 0.8235 0.5777 0.6232 0.090 Uiso 1 1 calc R . . 
C17 C 0.6263(12) 0.5557(3) 0.6305(7) 0.079(3) Uani 1 1 d . . . 
H17 H 0.6388 0.5448 0.7013 0.095 Uiso 1 1 calc R . . 
C18 C 0.4988(11) 0.5520(3) 0.5713(7) 0.075(3) Uani 1 1 d . . . 
H18 H 0.4240 0.5387 0.6020 0.089 Uiso 1 1 calc R . . 
C19 C 0.4805(9) 0.5683(2) 0.4651(6) 0.0551(19) Uani 1 1 d . . . 
C20 C 0.3535(8) 0.5641(2) 0.3876(6) 0.0537(19) Uani 1 1 d . . . 
C21 C 0.2264(10) 0.5443(3) 0.4078(7) 0.067(2) Uani 1 1 d . . . 
C22 C 0.1183(9) 0.5386(3) 0.3308(8) 0.073(2) Uani 1 1 d . . . 
H22 H 0.0358 0.5246 0.3463 0.088 Uiso 1 1 calc R . . 
C23 C 0.1358(8) 0.5545(3) 0.2286(7) 0.060(2) Uani 1 1 d . . . 
C24 C 0.2533(7) 0.5761(2) 0.2028(6) 0.0522(18) Uani 1 1 d . . . 
H24 H 0.2584 0.5873 0.1329 0.063 Uiso 1 1 calc R . . 
C25 C 0.3663(7) 0.5815(2) 0.2820(5) 0.0424(15) Uani 1 1 d . . . 
C26 C 0.4156(9) 0.6648(3) 0.0753(7) 0.062(2) Uani 1 1 d . . . 
H26 H 0.3958 0.6852 0.1280 0.074 Uiso 1 1 calc R . . 
C27 C 0.3663(11) 0.6723(3) -0.0313(8) 0.081(3) Uani 1 1 d . . . 
H27 H 0.3158 0.6977 -0.0500 0.097 Uiso 1 1 calc R . . 
C28 C 0.3907(11) 0.6431(4) -0.1080(8) 0.087(3) Uani 1 1 d . . . 
H28 H 0.3530 0.6471 -0.1796 0.104 Uiso 1 1 calc R . . 
C29 C 0.4733(10) 0.6064(3) -0.0799(7) 0.069(2) Uani 1 1 d . . . 
H29 H 0.4954 0.5865 -0.1331 0.083 Uiso 1 1 calc R . . 
C30 C 0.5227(8) 0.5998(2) 0.0292(6) 0.0495(18) Uani 1 1 d . . . 
C31 C 0.6033(7) 0.5616(2) 0.0759(6) 0.0458(16) Uani 1 1 d . . . 
C32 C 0.6627(9) 0.5289(3) 0.0168(6) 0.061(2) Uani 1 1 d . . . 
C33 C 0.7358(9) 0.4943(3) 0.0646(8) 0.069(2) Uani 1 1 d . . . 
H33 H 0.7736 0.4725 0.0230 0.082 Uiso 1 1 calc R . . 
C34 C 0.7509(9) 0.4932(2) 0.1766(7) 0.062(2) Uani 1 1 d . . . 
C35 C 0.6960(7) 0.5253(2) 0.2397(6) 0.0481(17) Uani 1 1 d . . . 
H35 H 0.7090 0.5236 0.3154 0.058 Uiso 1 1 calc R . . 
C36 C 0.6215(7) 0.5601(2) 0.1903(5) 0.0399(15) Uani 1 1 d . . . 
 
loop_ 
 _atom_site_aniso_label 
 _atom_site_aniso_U_11 
 _atom_site_aniso_U_22 
 _atom_site_aniso_U_33 
 _atom_site_aniso_U_23 
 _atom_site_aniso_U_13 
 _atom_site_aniso_U_12 
Ir1 0.04432(16) 0.03796(15) 0.03840(15) 0.00028(12) 0.00681(10) -0.00274(12) 
P1 0.105(2) 0.159(3) 0.0816(19) -0.046(2) 0.0360(18) -0.070(2) 
F1 0.048(3) 0.098(4) 0.109(4) -0.001(3) -0.007(3) -0.013(3) 
F2 0.103(4) 0.125(5) 0.087(4) 0.032(3) 0.039(3) -0.021(4) 
F3 0.142(5) 0.108(4) 0.048(3) -0.022(3) 0.019(3) 0.022(4) 
F4 0.122(5) 0.060(3) 0.105(4) 0.002(3) 0.006(3) 0.038(3) 
F5 0.135(9) 0.74(4) 0.161(10) -0.220(17) -0.007(7) 0.047(15) 
F6 0.211(10) 0.289(13) 0.159(8) -0.130(9) 0.019(7) 0.060(9) 
F7 0.123(6) 0.196(8) 0.108(5) -0.015(5) -0.008(4) -0.056(5) 
F8 0.195(11) 0.401(19) 0.284(16) 0.223(16) -0.076(11) -0.180(13) 
F9 0.083(5) 0.278(12) 0.219(10) -0.080(9) -0.019(6) -0.049(6) 
F10 0.117(7) 0.140(8) 0.59(3) 0.034(12) 0.099(12) -0.033(6) 
O1 0.094(5) 0.093(5) 0.147(7) 0.004(5) 0.019(5) -0.008(4) 
O2 0.073(4) 0.061(4) 0.118(5) 0.001(4) 0.041(4) -0.015(3) 
O3 0.146(8) 0.119(7) 0.152(8) -0.036(6) -0.001(7) 0.033(6) 
O4 0.115(6) 0.058(4) 0.096(5) -0.011(3) 0.026(4) 0.012(4) 
N1 0.039(3) 0.032(3) 0.044(3) 0.000(2) 0.007(2) 0.000(2) 
N2 0.046(3) 0.042(3) 0.045(3) -0.004(3) 0.009(3) -0.002(3) 
N3 0.060(4) 0.045(3) 0.031(3) 0.003(2) 0.006(3) 0.000(3) 
N4 0.050(3) 0.047(3) 0.035(3) 0.008(3) 0.003(3) -0.003(3) 
C1 0.048(4) 0.037(4) 0.057(4) -0.008(3) 0.006(3) 0.000(3) 
C2 0.033(4) 0.054(4) 0.056(4) -0.010(3) 0.005(3) 0.008(3) 
C3 0.044(4) 0.053(4) 0.040(4) -0.001(3) 0.005(3) -0.003(3) 
C4 0.053(4) 0.038(4) 0.042(4) -0.003(3) 0.007(3) -0.003(3) 
C5 0.047(4) 0.037(3) 0.036(3) 0.001(3) 0.003(3) 0.000(3) 
C6 0.051(4) 0.037(4) 0.034(3) 0.000(3) 0.005(3) -0.001(3) 
C7 0.048(4) 0.046(4) 0.045(4) -0.007(3) 0.005(3) -0.005(3) 
C8 0.059(5) 0.051(4) 0.043(4) -0.006(3) 0.010(3) 0.009(4) 
C9 0.063(5) 0.063(5) 0.068(5) -0.008(4) 0.030(4) 0.002(4) 
C10 0.055(5) 0.052(4) 0.069(5) -0.004(4) 0.025(4) -0.006(4) 
C11 0.042(4) 0.046(4) 0.041(4) -0.003(3) 0.010(3) 0.012(3) 
C12 0.091(7) 0.065(6) 0.123(9) 0.008(6) 0.033(6) -0.023(5) 
C13 0.038(4) 0.062(5) 0.048(4) -0.010(4) 0.015(3) 0.007(4) 
C14 0.206(15) 0.043(6) 0.132(11) -0.011(6) 0.056(10) 0.009(7) 
C15 0.070(5) 0.053(4) 0.047(4) -0.001(4) -0.002(4) -0.008(4) 
C16 0.097(7) 0.076(6) 0.048(5) 0.000(4) -0.014(5) -0.003(5) 
C17 0.128(9) 0.063(6) 0.046(5) 0.009(4) 0.008(6) -0.001(6) 
C18 0.105(7) 0.072(6) 0.048(5) 0.007(4) 0.014(5) -0.009(5) 
C19 0.080(6) 0.045(4) 0.041(4) 0.000(3) 0.014(4) -0.005(4) 
C20 0.055(5) 0.051(4) 0.058(5) 0.003(4) 0.021(4) -0.008(4) 
C21 0.074(6) 0.069(5) 0.062(5) 0.019(4) 0.021(5) -0.007(5) 
C22 0.056(5) 0.069(6) 0.097(7) 0.000(5) 0.021(5) -0.010(4) 
C23 0.048(5) 0.060(5) 0.071(6) 0.003(4) 0.000(4) 0.001(4) 
C24 0.047(4) 0.054(4) 0.056(5) -0.002(4) 0.009(4) -0.003(3) 
C25 0.047(4) 0.036(3) 0.046(4) -0.005(3) 0.013(3) -0.004(3) 
C26 0.077(6) 0.049(4) 0.058(5) 0.005(4) -0.005(4) 0.006(4) 
C27 0.098(7) 0.080(7) 0.062(6) 0.019(5) -0.002(5) 0.023(5) 
C28 0.089(7) 0.115(9) 0.054(6) 0.022(6) -0.008(5) 0.011(6) 
C29 0.081(6) 0.082(6) 0.046(5) -0.004(4) 0.009(4) -0.006(5) 
C30 0.054(4) 0.051(4) 0.043(4) 0.002(3) 0.005(3) -0.013(3) 
C31 0.051(4) 0.042(4) 0.045(4) -0.003(3) 0.008(3) -0.010(3) 
C32 0.072(5) 0.068(5) 0.043(4) -0.011(4) 0.009(4) -0.006(4) 
C33 0.082(6) 0.050(5) 0.077(6) -0.017(4) 0.021(5) 0.009(4) 
C34 0.069(5) 0.040(4) 0.077(6) -0.003(4) 0.010(4) 0.003(4) 
C35 0.055(4) 0.042(4) 0.048(4) -0.006(3) 0.009(3) -0.006(3) 
C36 0.039(4) 0.039(4) 0.043(4) -0.001(3) 0.008(3) -0.006(3) 
 
_geom_special_details 
; 
 All esds (except the esd in the dihedral angle between two l.s. planes) 
 are estimated using the full covariance matrix.  The cell esds are taken 
 into account individually in the estimation of esds in distances, angles 
 and torsion angles; correlations between esds in cell parameters are only 
 used when they are defined by crystal symmetry.  An approximate (isotropic) 
 treatment of cell esds is used for estimating esds involving l.s. planes. 
; 
 
loop_ 
 _geom_bond_atom_site_label_1 
 _geom_bond_atom_site_label_2 
 _geom_bond_distance 
 _geom_bond_site_symmetry_2 
 _geom_bond_publ_flag 
Ir1 C25 2.009(6) . ? 
Ir1 C36 2.017(6) . ? 
Ir1 N4 2.050(5) . ? 
Ir1 N3 2.064(5) . ? 
Ir1 N2 2.135(5) . ? 
Ir1 N1 2.140(5) . ? 
P1 F8 1.453(11) . ? 
P1 F6 1.460(8) . ? 
P1 F9 1.513(8) . ? 
P1 F10 1.527(12) . ? 
P1 F5 1.529(12) . ? 
P1 F7 1.616(8) . ? 
F1 C23 1.363(9) . ? 
F2 C21 1.368(9) . ? 
F3 C32 1.358(9) . ? 
F4 C34 1.347(9) . ? 
O1 C11 1.165(9) . ? 
O2 C11 1.310(8) . ? 
O2 C12 1.428(10) . ? 
O3 C13 1.176(10) . ? 
O4 C13 1.292(9) . ? 
O4 C14 1.470(10) . ? 
N1 C1 1.337(8) . ? 
N1 C5 1.362(8) . ? 
N2 C10 1.348(9) . ? 
N2 C6 1.354(8) . ? 
N3 C15 1.339(9) . ? 
N3 C19 1.358(9) . ? 
N4 C26 1.336(9) . ? 
N4 C30 1.357(9) . ? 
C1 C2 1.378(10) . ? 
C1 H1 0.9300 . ? 
C2 C3 1.382(9) . ? 
C2 H2 0.9300 . ? 
C3 C4 1.383(9) . ? 
C3 C11 1.547(10) . ? 
C4 C5 1.390(9) . ? 
C4 H4 0.9300 . ? 
C5 C6 1.476(9) . ? 
C6 C7 1.385(9) . ? 
C7 C8 1.384(10) . ? 
C7 H7 0.9300 . ? 
C8 C9 1.378(11) . ? 
C8 C13 1.559(10) . ? 
C9 C10 1.379(10) . ? 
C9 H9 0.9300 . ? 
C10 H10 0.9300 . ? 
C12 H12A 0.9600 . ? 
C12 H12B 0.9600 . ? 
C12 H12C 0.9600 . ? 
C14 H14A 0.9600 . ? 
C14 H14B 0.9600 . ? 
C14 H14C 0.9600 . ? 
C15 C16 1.387(11) . ? 
C15 H15 0.9300 . ? 
C16 C17 1.372(13) . ? 
C16 H16 0.9300 . ? 
C17 C18 1.367(13) . ? 
C17 H17 0.9300 . ? 
C18 C19 1.395(11) . ? 
C18 H18 0.9300 . ? 
C19 C20 1.481(11) . ? 
C20 C21 1.397(11) . ? 
C20 C25 1.417(10) . ? 
C21 C22 1.349(12) . ? 
C22 C23 1.372(12) . ? 
C22 H22 0.9300 . ? 
C23 C24 1.362(10) . ? 
C24 C25 1.398(10) . ? 
C24 H24 0.9300 . ? 
C26 C27 1.373(11) . ? 
C26 H26 0.9300 . ? 
C27 C28 1.332(13) . ? 
C27 H27 0.9300 . ? 
C28 C29 1.394(13) . ? 
C28 H28 0.9300 . ? 
C29 C30 1.397(11) . ? 
C29 H29 0.9300 . ? 
C30 C31 1.484(10) . ? 
C31 C32 1.382(10) . ? 
C31 C36 1.404(9) . ? 
C32 C33 1.368(11) . ? 
C33 C34 1.374(12) . ? 
C33 H33 0.9300 . ? 
C34 C35 1.379(10) . ? 
C35 C36 1.387(9) . ? 
C35 H35 0.9300 . ? 
 
loop_ 
 _geom_angle_atom_site_label_1 
 _geom_angle_atom_site_label_2 
 _geom_angle_atom_site_label_3 
 _geom_angle 
 _geom_angle_site_symmetry_1 
 _geom_angle_site_symmetry_3 
 _geom_angle_publ_flag 
C25 Ir1 C36 90.1(3) . . ? 
C25 Ir1 N4 93.1(2) . . ? 
C36 Ir1 N4 80.0(2) . . ? 
C25 Ir1 N3 80.3(3) . . ? 
C36 Ir1 N3 95.9(2) . . ? 
N4 Ir1 N3 172.2(2) . . ? 
C25 Ir1 N2 97.5(2) . . ? 
C36 Ir1 N2 171.2(2) . . ? 
N4 Ir1 N2 95.2(2) . . ? 
N3 Ir1 N2 89.7(2) . . ? 
C25 Ir1 N1 173.8(2) . . ? 
C36 Ir1 N1 96.0(2) . . ? 
N4 Ir1 N1 87.4(2) . . ? 
N3 Ir1 N1 99.6(2) . . ? 
N2 Ir1 N1 76.3(2) . . ? 
F8 P1 F6 93.6(11) . . ? 
F8 P1 F9 92.5(7) . . ? 
F6 P1 F9 92.7(6) . . ? 
F8 P1 F10 175.4(11) . . ? 
F6 P1 F10 90.9(8) . . ? 
F9 P1 F10 88.1(7) . . ? 
F8 P1 F5 91.9(10) . . ? 
F6 P1 F5 171.6(9) . . ? 
F9 P1 F5 93.3(6) . . ? 
F10 P1 F5 83.5(11) . . ? 
F8 P1 F7 90.5(5) . . ? 
F6 P1 F7 90.3(5) . . ? 
F9 P1 F7 175.6(6) . . ? 
F10 P1 F7 88.6(6) . . ? 
F5 P1 F7 83.4(5) . . ? 
C11 O2 C12 116.4(7) . . ? 
C13 O4 C14 116.0(8) . . ? 
C1 N1 C5 118.2(5) . . ? 
C1 N1 Ir1 126.1(4) . . ? 
C5 N1 Ir1 115.0(4) . . ? 
C10 N2 C6 118.5(6) . . ? 
C10 N2 Ir1 125.4(5) . . ? 
C6 N2 Ir1 116.0(4) . . ? 
C15 N3 C19 120.3(6) . . ? 
C15 N3 Ir1 123.6(5) . . ? 
C19 N3 Ir1 116.1(5) . . ? 
C26 N4 C30 119.0(6) . . ? 
C26 N4 Ir1 123.9(5) . . ? 
C30 N4 Ir1 116.9(5) . . ? 
N1 C1 C2 122.5(6) . . ? 
N1 C1 H1 118.7 . . ? 
C2 C1 H1 118.7 . . ? 
C1 C2 C3 120.2(6) . . ? 
C1 C2 H2 119.9 . . ? 
C3 C2 H2 119.9 . . ? 
C2 C3 C4 117.5(6) . . ? 
C2 C3 C11 121.4(6) . . ? 
C4 C3 C11 121.1(6) . . ? 
C3 C4 C5 120.3(6) . . ? 
C3 C4 H4 119.9 . . ? 
C5 C4 H4 119.9 . . ? 
N1 C5 C4 121.2(6) . . ? 
N1 C5 C6 115.4(5) . . ? 
C4 C5 C6 123.4(6) . . ? 
N2 C6 C7 121.5(6) . . ? 
N2 C6 C5 115.3(5) . . ? 
C7 C6 C5 123.1(6) . . ? 
C8 C7 C6 119.8(7) . . ? 
C8 C7 H7 120.1 . . ? 
C6 C7 H7 120.1 . . ? 
C9 C8 C7 118.2(7) . . ? 
C9 C8 C13 120.5(7) . . ? 
C7 C8 C13 121.2(7) . . ? 
C8 C9 C10 119.9(7) . . ? 
C8 C9 H9 120.0 . . ? 
C10 C9 H9 120.0 . . ? 
N2 C10 C9 122.0(7) . . ? 
N2 C10 H10 119.0 . . ? 
C9 C10 H10 119.0 . . ? 
O1 C11 O2 131.6(8) . . ? 
O1 C11 C3 119.6(7) . . ? 
O2 C11 C3 108.7(6) . . ? 
O2 C12 H12A 109.5 . . ? 
O2 C12 H12B 109.5 . . ? 
H12A C12 H12B 109.5 . . ? 
O2 C12 H12C 109.5 . . ? 
H12A C12 H12C 109.5 . . ? 
H12B C12 H12C 109.5 . . ? 
O3 C13 O4 127.2(9) . . ? 
O3 C13 C8 123.9(8) . . ? 
O4 C13 C8 108.9(6) . . ? 
O4 C14 H14A 109.5 . . ? 
O4 C14 H14B 109.5 . . ? 
H14A C14 H14B 109.5 . . ? 
O4 C14 H14C 109.5 . . ? 
H14A C14 H14C 109.5 . . ? 
H14B C14 H14C 109.5 . . ? 
N3 C15 C16 121.1(8) . . ? 
N3 C15 H15 119.4 . . ? 
C16 C15 H15 119.4 . . ? 
C17 C16 C15 119.4(9) . . ? 
C17 C16 H16 120.3 . . ? 
C15 C16 H16 120.3 . . ? 
C18 C17 C16 119.4(8) . . ? 
C18 C17 H17 120.3 . . ? 
C16 C17 H17 120.3 . . ? 
C17 C18 C19 120.1(9) . . ? 
C17 C18 H18 119.9 . . ? 
C19 C18 H18 119.9 . . ? 
N3 C19 C18 119.6(8) . . ? 
N3 C19 C20 113.4(6) . . ? 
C18 C19 C20 126.9(8) . . ? 
C21 C20 C25 118.0(7) . . ? 
C21 C20 C19 126.7(7) . . ? 
C25 C20 C19 115.2(6) . . ? 
C22 C21 F2 117.4(8) . . ? 
C22 C21 C20 123.6(8) . . ? 
F2 C21 C20 118.9(8) . . ? 
C21 C22 C23 116.7(8) . . ? 
C21 C22 H22 121.6 . . ? 
C23 C22 H22 121.6 . . ? 
C24 C23 F1 118.1(8) . . ? 
C24 C23 C22 123.6(8) . . ? 
F1 C23 C22 118.3(7) . . ? 
C23 C24 C25 119.7(7) . . ? 
C23 C24 H24 120.2 . . ? 
C25 C24 H24 120.2 . . ? 
C24 C25 C20 118.2(6) . . ? 
C24 C25 Ir1 127.3(5) . . ? 
C20 C25 Ir1 114.5(5) . . ? 
N4 C26 C27 122.4(8) . . ? 
N4 C26 H26 118.8 . . ? 
C27 C26 H26 118.8 . . ? 
C28 C27 C26 120.0(9) . . ? 
C28 C27 H27 120.0 . . ? 
C26 C27 H27 120.0 . . ? 
C27 C28 C29 119.3(9) . . ? 
C27 C28 H28 120.3 . . ? 
C29 C28 H28 120.3 . . ? 
C28 C29 C30 119.3(8) . . ? 
C28 C29 H29 120.3 . . ? 
C30 C29 H29 120.3 . . ? 
N4 C30 C29 119.9(7) . . ? 
N4 C30 C31 112.9(6) . . ? 
C29 C30 C31 127.2(7) . . ? 
C32 C31 C36 118.9(7) . . ? 
C32 C31 C30 125.8(7) . . ? 
C36 C31 C30 115.3(6) . . ? 
F3 C32 C33 116.4(7) . . ? 
F3 C32 C31 120.5(8) . . ? 
C33 C32 C31 123.1(7) . . ? 
C32 C33 C34 117.0(7) . . ? 
C32 C33 H33 121.5 . . ? 
C34 C33 H33 121.5 . . ? 
F4 C34 C33 118.2(7) . . ? 
F4 C34 C35 119.4(8) . . ? 
C33 C34 C35 122.4(8) . . ? 
C34 C35 C36 120.0(7) . . ? 
C34 C35 H35 120.0 . . ? 
C36 C35 H35 120.0 . . ? 
C35 C36 C31 118.5(6) . . ? 
C35 C36 Ir1 126.6(5) . . ? 
C31 C36 Ir1 114.7(5) . . ? 
 
loop_ 
 _geom_hbond_atom_site_label_D 
 _geom_hbond_atom_site_label_H 
 _geom_hbond_atom_site_label_A 
 _geom_hbond_distance_DH 
 _geom_hbond_distance_HA 
 _geom_hbond_distance_DA 
 _geom_hbond_angle_DHA 
 _geom_hbond_site_symmetry_A 
C4 H4 O2  0.93 2.36 2.685(8) 100.1 . 
C18 H18 F2  0.93 2.26 2.878(12) 123.1 . 
C24 H24 N4  0.93 2.61 3.108(9) 114.2 . 
C26 H26 N2  0.93 2.59 3.173(10) 120.9 . 
C29 H29 F3  0.93 2.29 2.891(11) 121.5 . 
 
_diffrn_measured_fraction_theta_max    0.997 
_diffrn_reflns_theta_full              25.05 
_diffrn_measured_fraction_theta_full   0.997 
_refine_diff_density_max    1.039 
_refine_diff_density_min   -0.774 
_refine_diff_density_rms    0.104 
